# Supplementary material for: European and American Strains of Porcine Parainfluenza Virus 1 (PPIV-1) Belong to Two Distinct Genetic Lineages
Source: MDPI journal article supplement (doi:10.3390/pathogens11030375), 2022-03-20
Supplement: s1 [file s1]

**Supplementary table S1.** Sequencing primers used for sequencing of F gene of Polish PPIV-1 viruses.

| <b>Primer</b> | <b>Nucleotide position in PPIV-1 genome<br/>(MT995732)</b> | <b>Sequence</b>            | <b>Reference</b>     |
|---------------|------------------------------------------------------------|----------------------------|----------------------|
| F-For1        | 4827-4852                                                  | ACTTAGGGTACAAGTTATCCAAAAAA | Park et al. 2019 [4] |
| F-For2        | 5537-5561                                                  | GAGAGAAGAGCTTAACATTACAGGC  | Park et al. 2019 [4] |
| F-For3        | 5338-5361                                                  | TAAAAGAAGCAATGGAGAAGACCC   | This work            |
| F-For4        | 5376-5398                                                  | GATACTGGCTCTCAAAATGCTCC    | This work            |
| F-Rev1        | 5611-5636                                                  | TCATAAATATCTGTYTTCCCGAGATT | Park et al. 2019 [4] |
| F-Rev2        | 6581-6600                                                  | TCGTGCACCCTAAGTTTTCTTTA    | Park et al. 2019 [4] |
